# Supplementary material for: Quantifying the drivers and heterogeneity of global total precipitable water
Source: Royal Society of Chemistry journal article supplement (doi:10.1039/d4ea00030g), 2024-01-01
Supplement: d4ea00030g1.pdf [file d4ea00030g1.pdf]

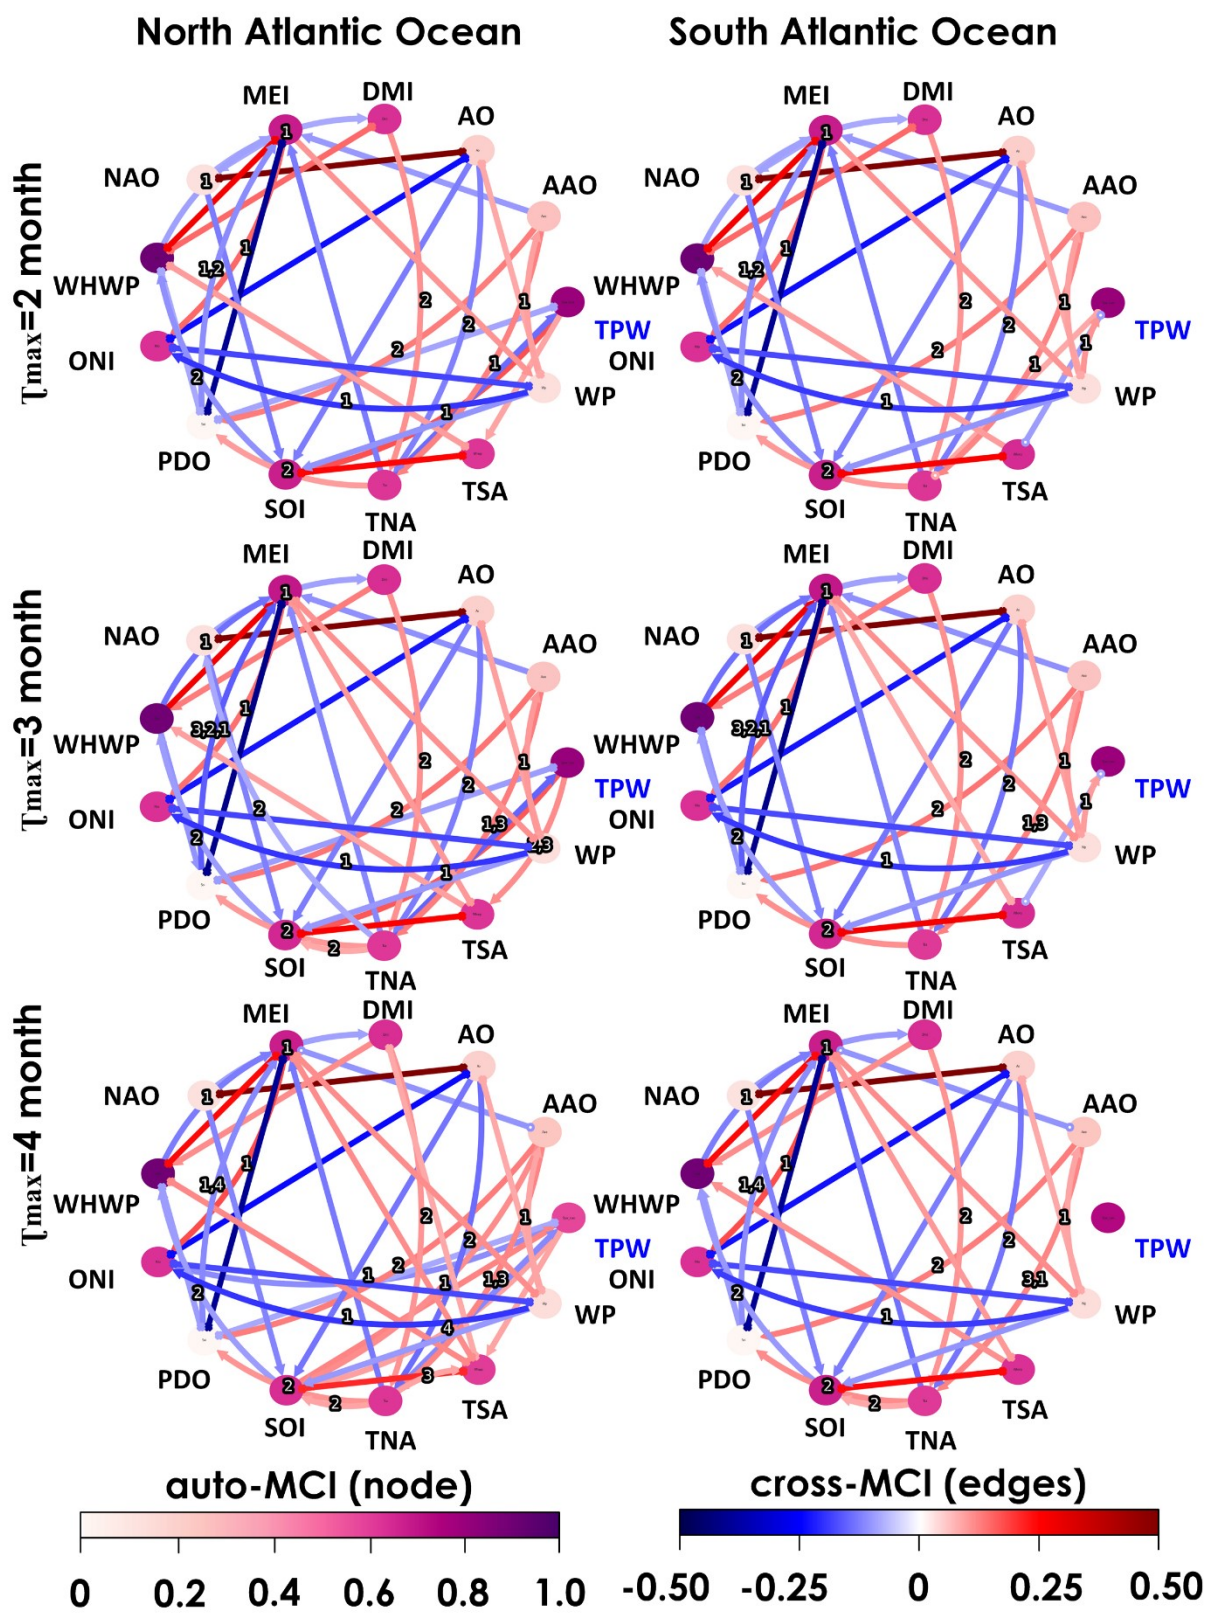

1

2 Fig. S1 Causal graphs of the Atlantic oceanic region, the maximum time delay denoted as  $\tau_{\max}$  in different months,  
 3 alongside the significance threshold  $\alpha=0.1$ .

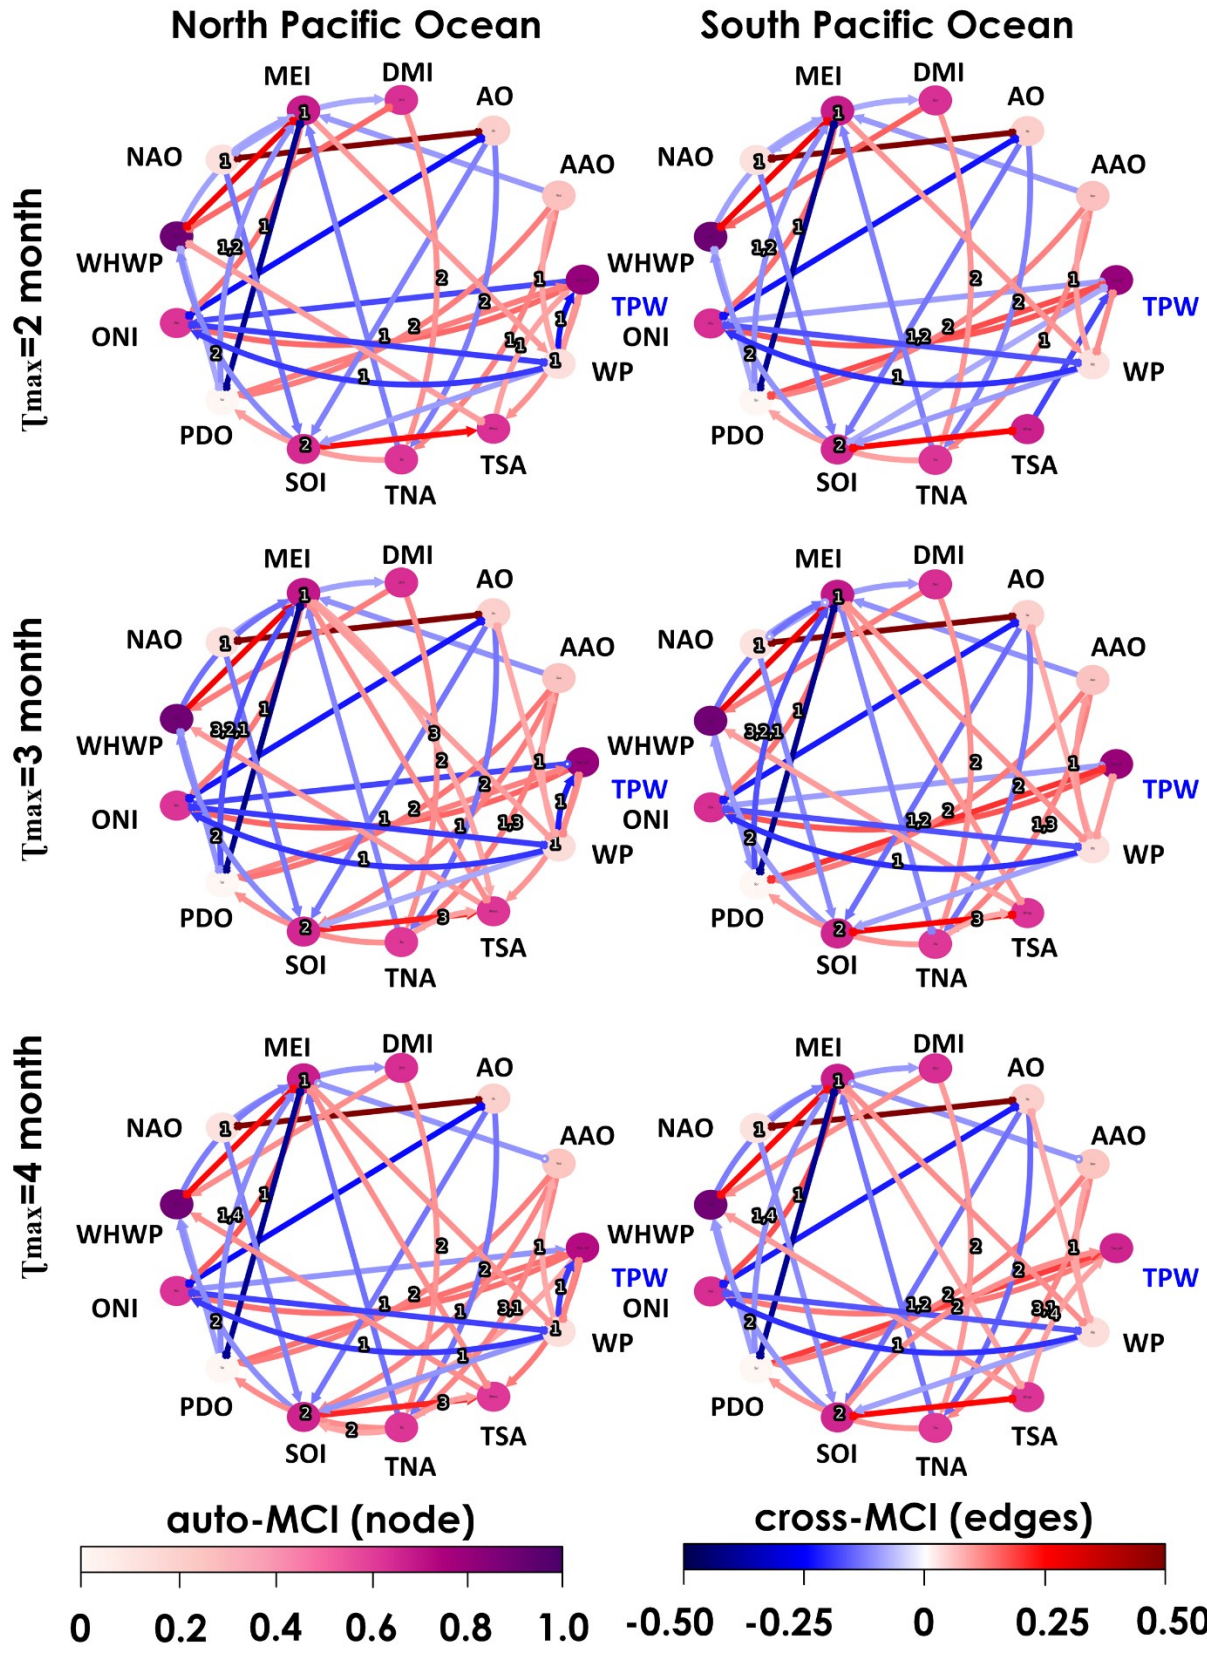

Fig

4

5 . S2 Causal graphs of the Pacific oceanic region, the maximum time delay denoted as  $T_{max}$  in different months,

6 alongside the significance threshold  $\alpha=0.1$ .

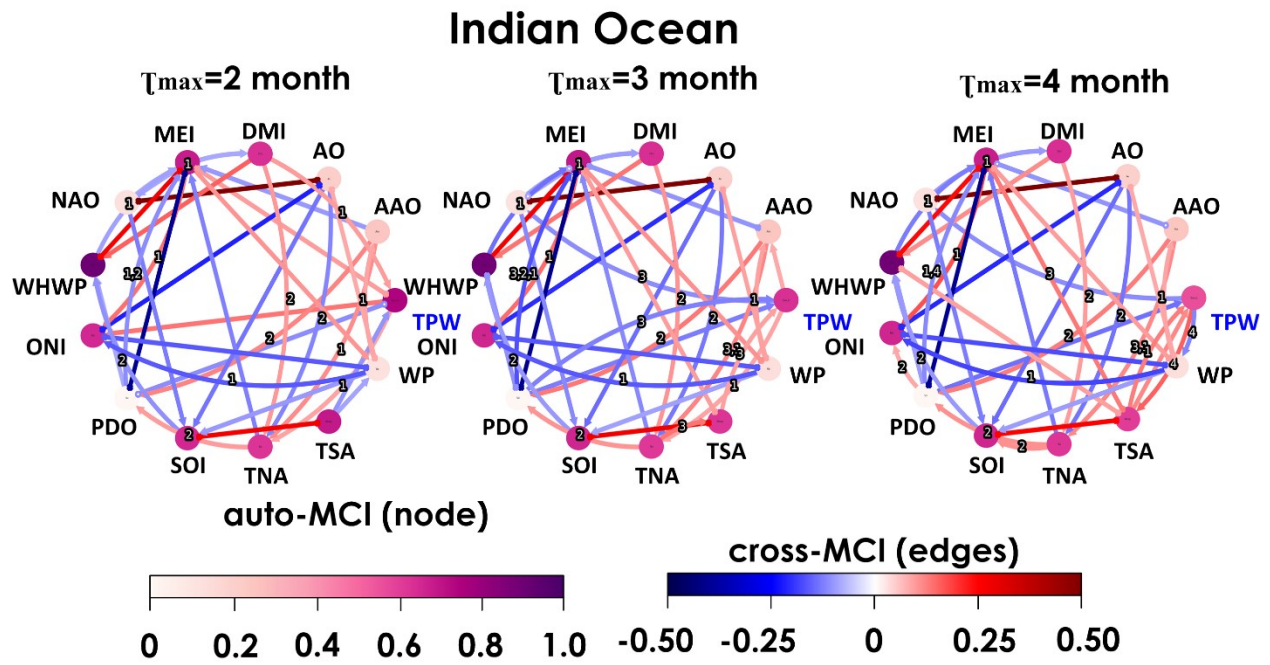

7

8 **Fig. S3** Causal graphs of the Indian oceanic region, the maximum time delay denoted as  $\tau_{\max}$  in different months,  
 9 alongside the significance threshold  $\alpha=0.1$ .

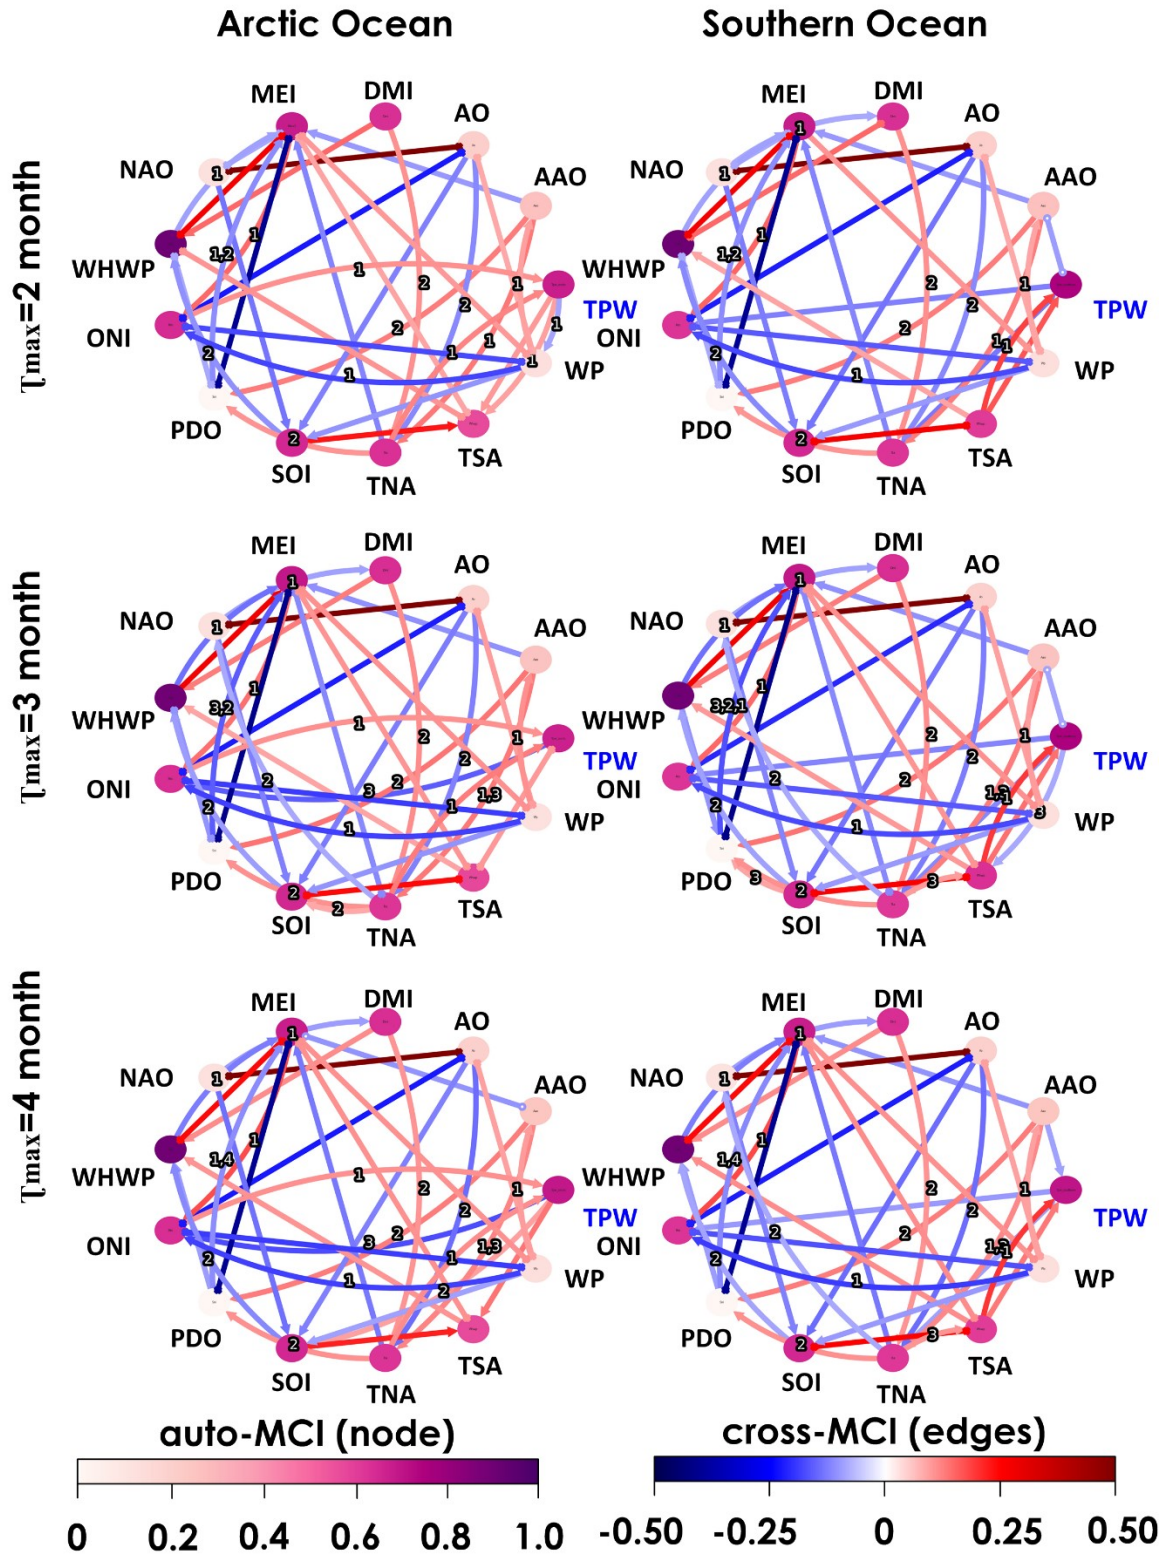

11 Fig. S4 Causal graphs of the Polar oceanic region, the maximum time delay denoted as  $T_{\max}$  in different months,  
 12 alongside the significance threshold  $\alpha=0.1$ .
